# Supplementary material
Source: ML conference proceedings conference paper supplement (https://openreview.net/forum?id=lJx2vng-KiC)

Small

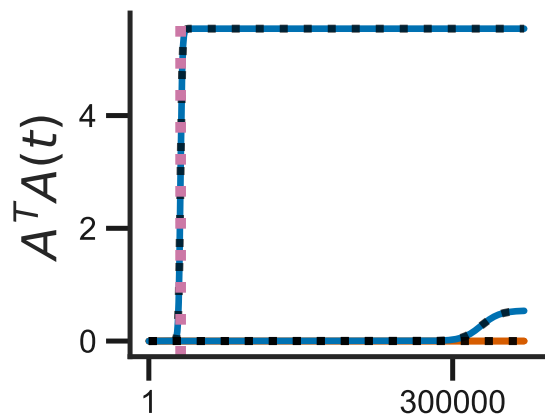

Intermediate

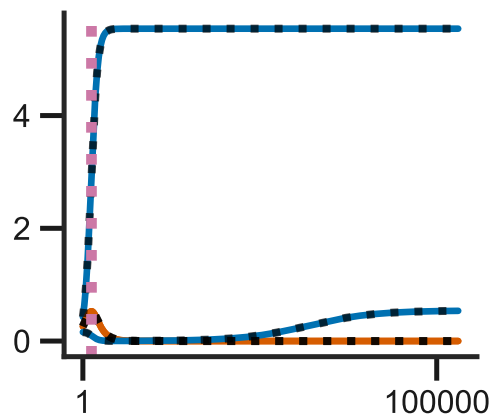

Large

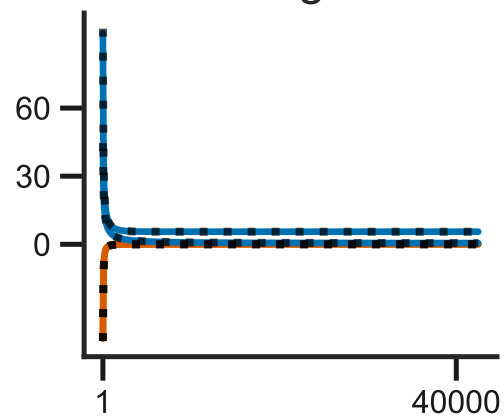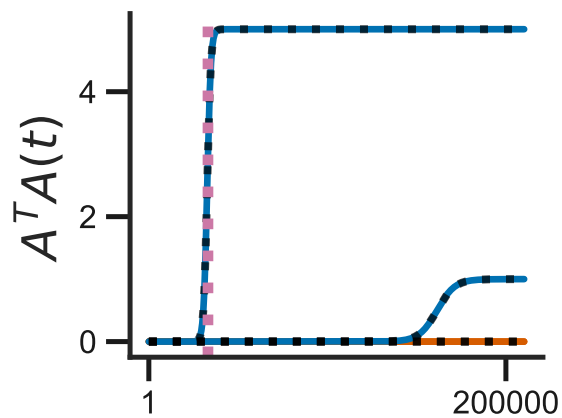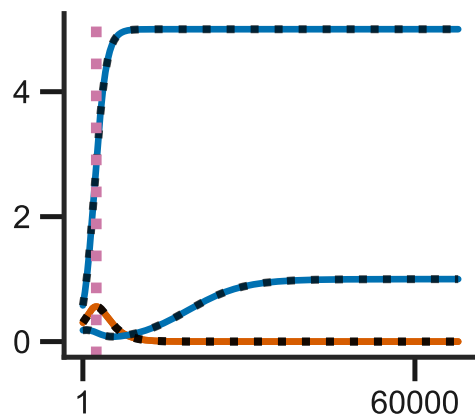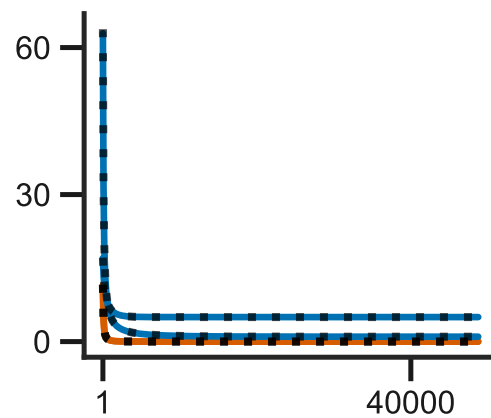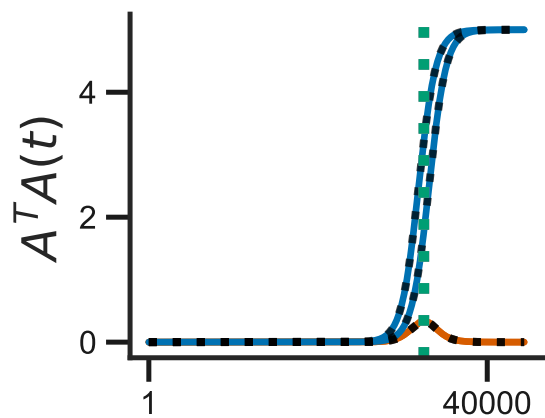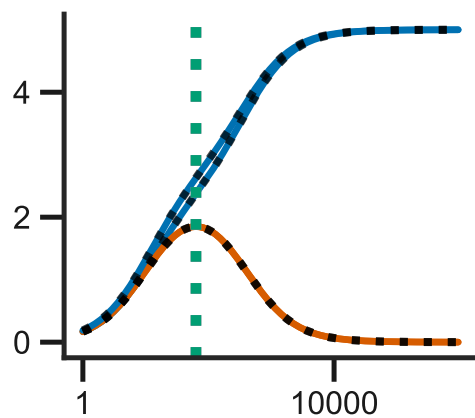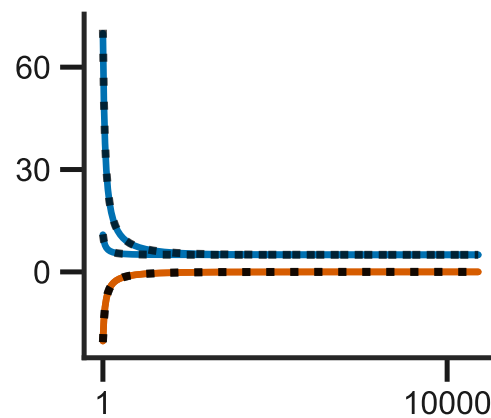

Training steps

Training steps

Training steps

Supplement: supplementary_material [file attachment]

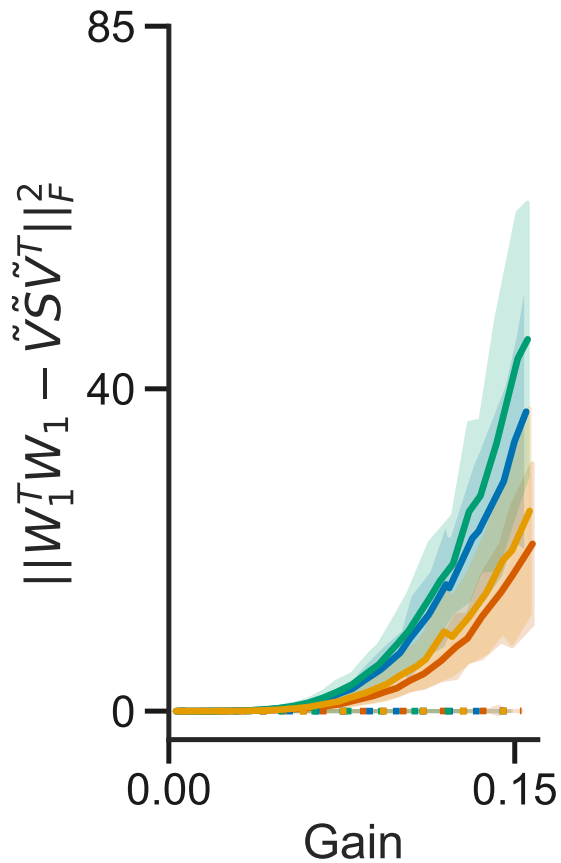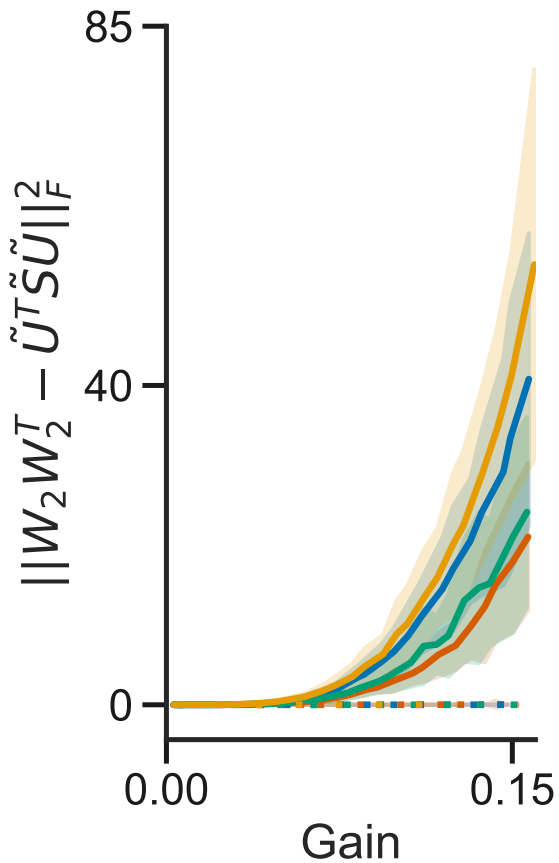

Supplement: supplementary_material [file attachment]

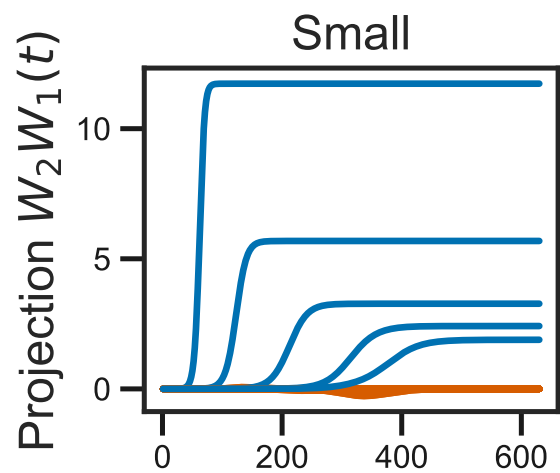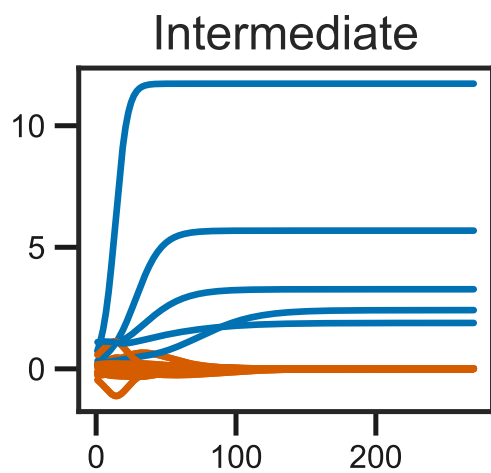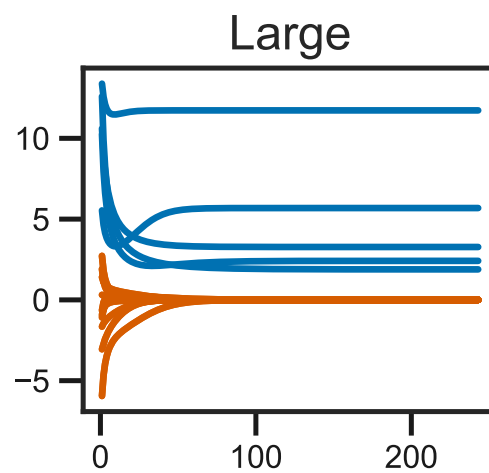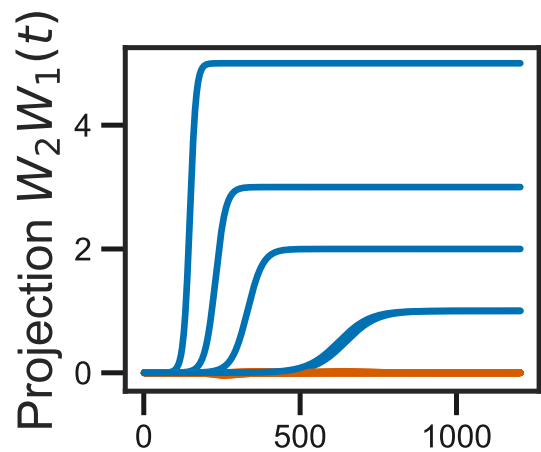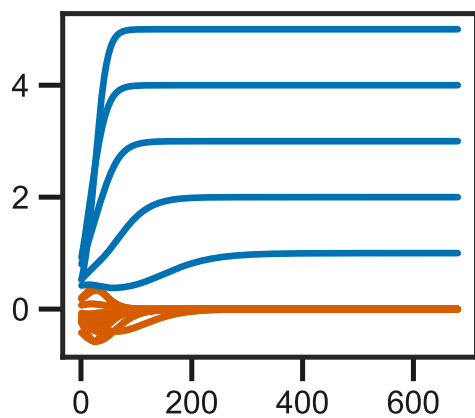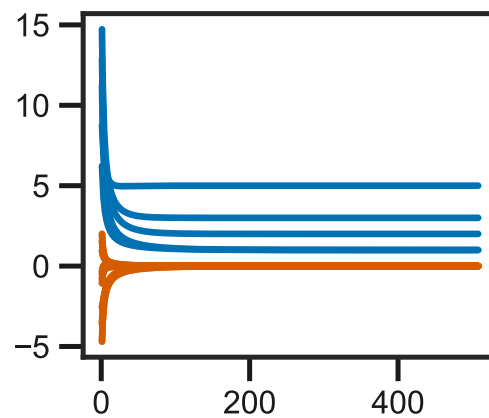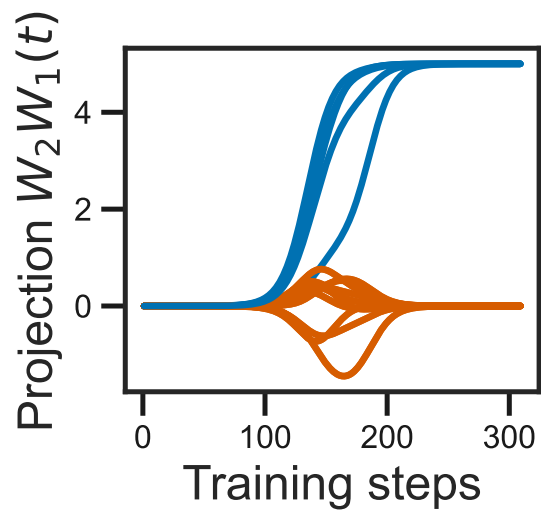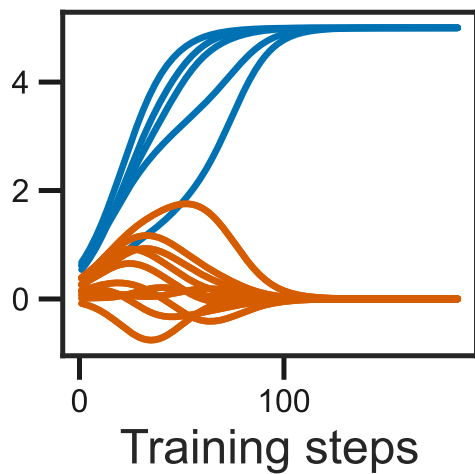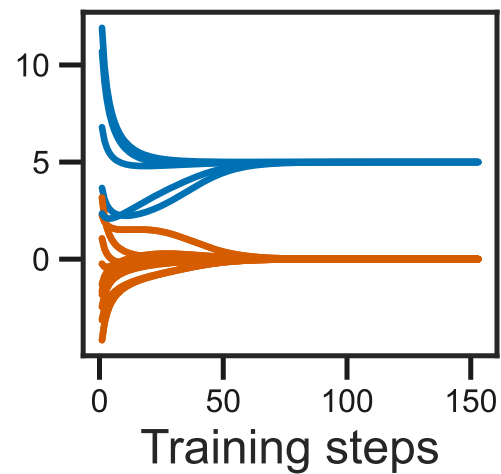

Supplement: supplementary_material [file attachment]

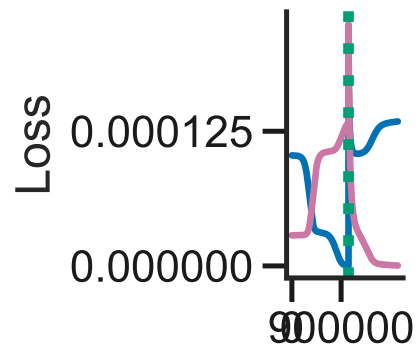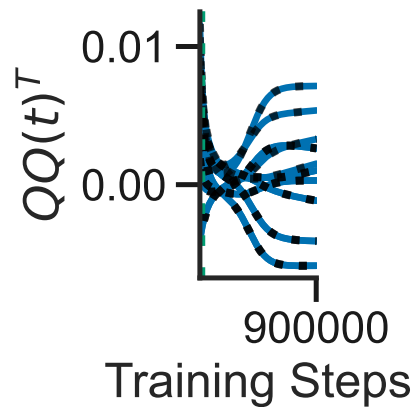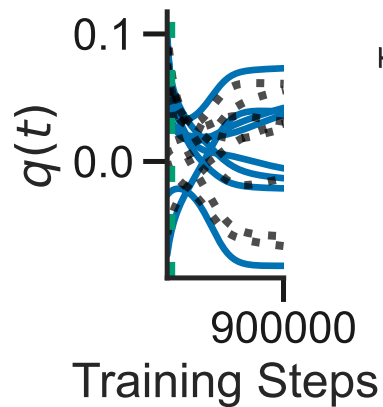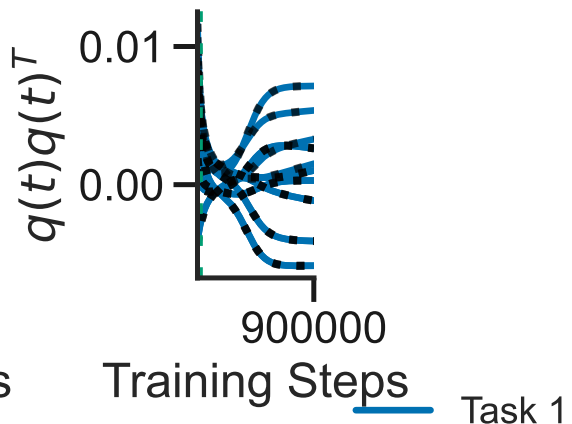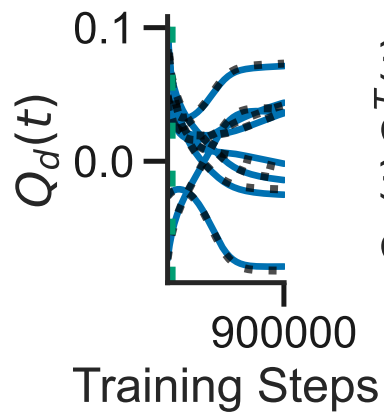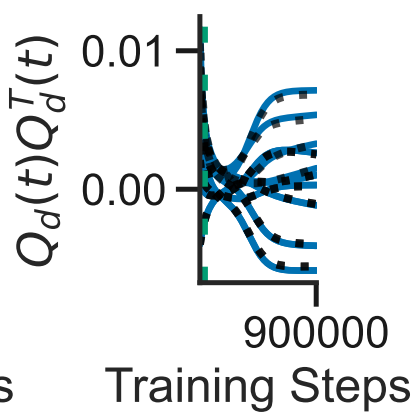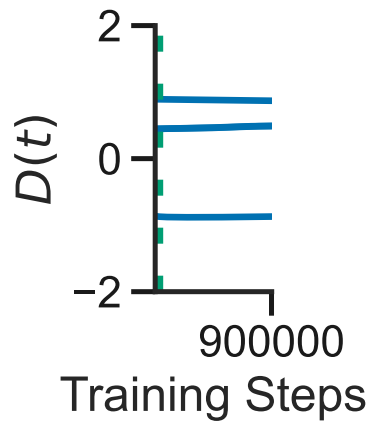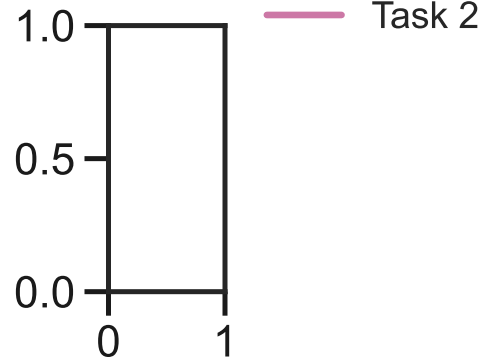

Supplement: supplementary_material [file attachment]

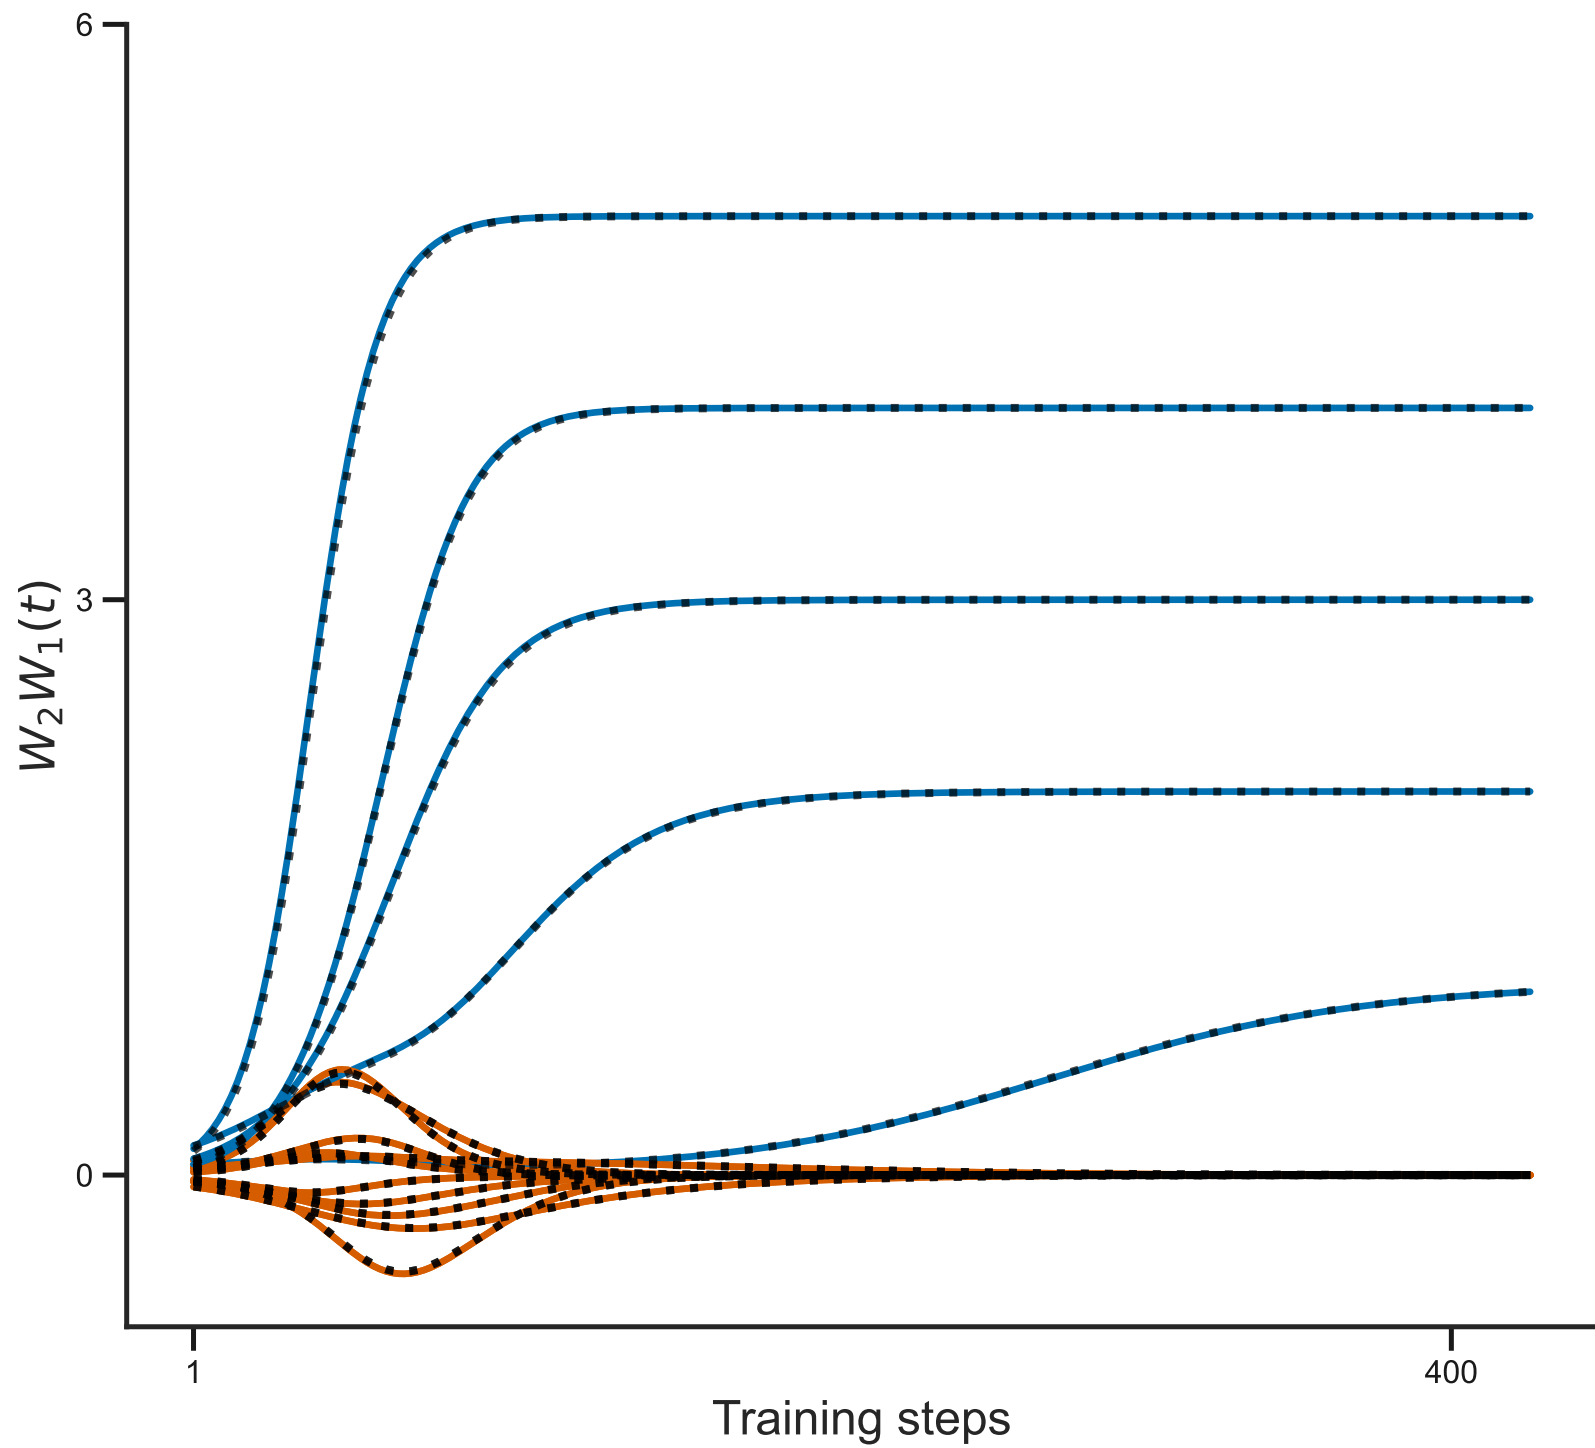

Supplement: supplementary_material [file attachment]

Small

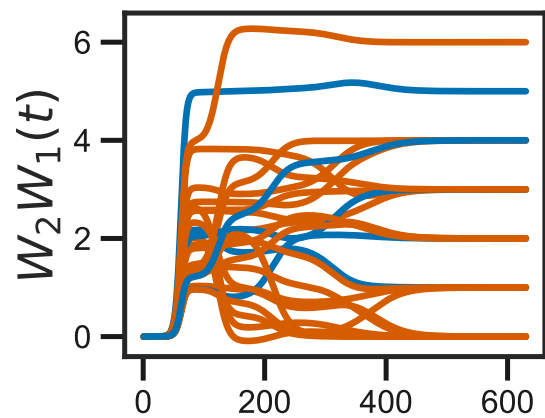

Intermediate

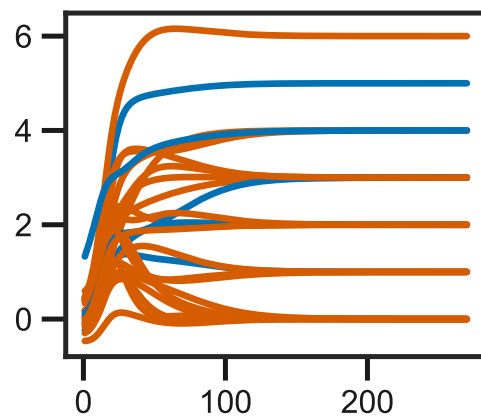

Large

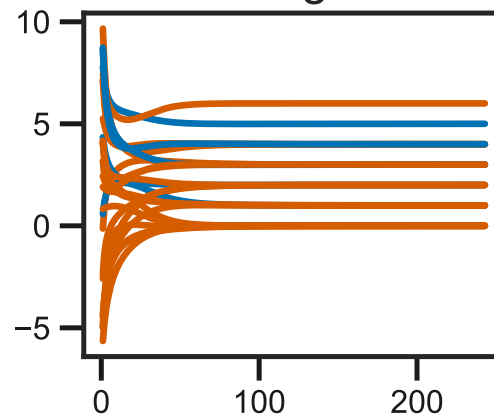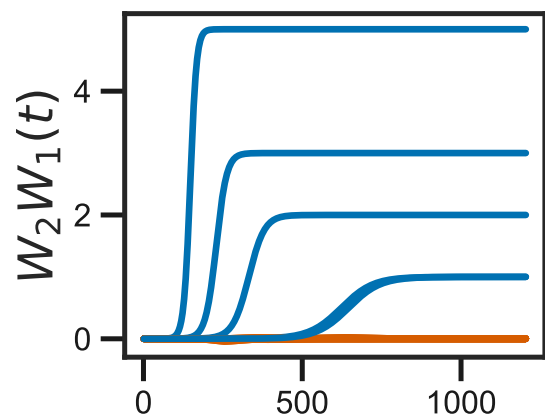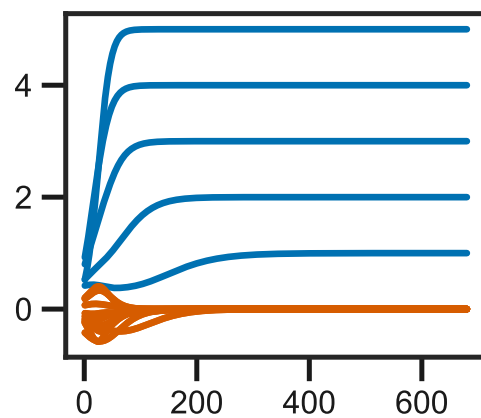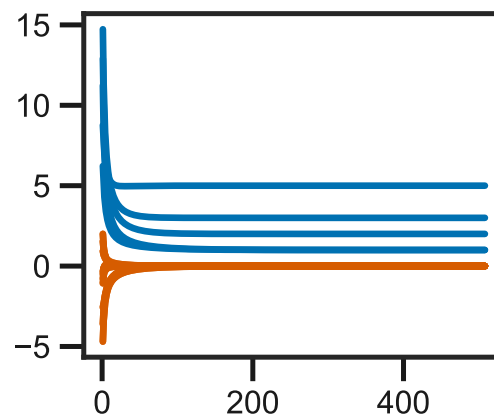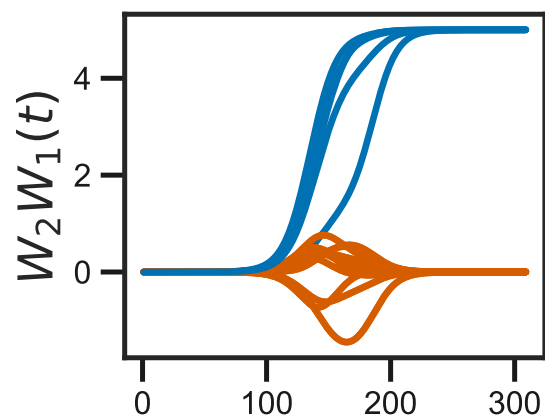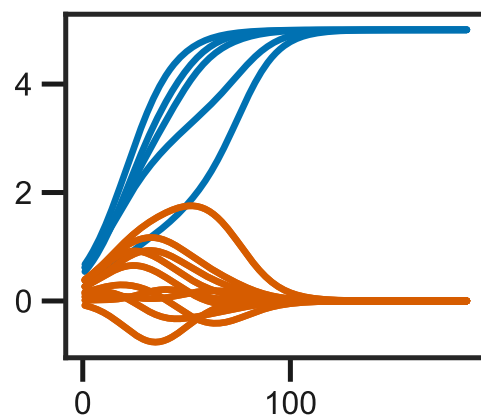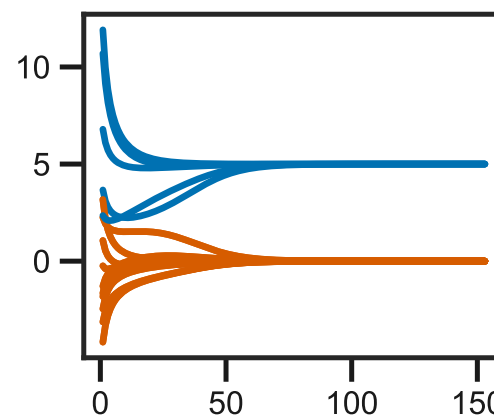

Training steps

Training steps

Training steps

Supplement: supplementary_material [file attachment]
